# Supplementary material for: Patient-Reported Questionnaires to Identify Adverse Drug Reactions: A Systematic Review
Source: Int J Environ Res Public Health. 2021 Nov 12;18(22):11877. doi: 10.3390/ijerph182211877 (PMC8624083; doi:10.3390/ijerph182211877)
Supplement: Supplementary file 1 [file ijerph-18-11877-s001.zip › Table S1.pdf]

**Table S1: Methodological quality of studies included**

| S/N<br>o. | PROM                                                           | Reference                     | PROM<br>development | Methodological quality of studies/ quality of measurement properties of PROM |                        |                         |                                |             |                       |                       |                       |                    |
|-----------|----------------------------------------------------------------|-------------------------------|---------------------|------------------------------------------------------------------------------|------------------------|-------------------------|--------------------------------|-------------|-----------------------|-----------------------|-----------------------|--------------------|
|           |                                                                |                               |                     | Content<br>validity                                                          | Structural<br>validity | Internal<br>consistency | Cross-<br>cultural<br>validity | Reliability | Measurem<br>ent error | Criterion<br>validity | Hypothesis<br>testing | Responsiv<br>eness |
| 1         | Generic<br>symptoms<br>questionnaire                           | Jarernsirip<br>ornkul<br>2001 | Adequate            | Inadequate                                                                   | N/a                    | N/a                     | N/a                            | N/a         | N/a                   | Inadequate            | N/a                   | N/a                |
| 2         | TSQM                                                           | Atkinson<br>2004              | Doubtful            | Inadequate                                                                   | Adequate               | Very good               | N/a                            | Adequate    | N/a                   | N/a                   | N/a                   | N/a                |
| 3         | Patient-<br>reported<br>Adverse Drug<br>Event<br>Questionnaire | Vries 2013                    | Doubtful            | Inadequate                                                                   | N/a                    | N/a                     | N/a                            | Doubtful    | N/a                   | N/a                   | Adequate              | N/a                |
| 4         | PROMISE                                                        | Schoenmak<br>ers 2017         | Doubtful            | Inadequate                                                                   | N/a                    | N/a                     | N/a                            | N/a         | N/a                   | N/a                   | N/a                   | N/a                |
| 5         | M3Q                                                            | Ashoorian<br>2015             | Adequate            | Inadequate                                                                   | N/a                    | Very good               | N/a                            | N/a         | N/a                   | N/a                   | N/a                   | N/a                |
| 6         | ASC-SR                                                         | Dott 2001                     | Doubtful            | Inadequate                                                                   | N/a                    | N/a                     | N/a                            | N/a         | N/a                   | N/a                   | N/a                   | N/a                |
| 7         | SRA                                                            | Wolters<br>2006               | Adequate            | Inadequate                                                                   | N/a                    | Very good               | N/a                            | Adequate    | N/a                   | Very good             | Adequate              | N/a                |
| 8         | GASS                                                           | Waddell<br>2008               | Adequate            | Inadequate                                                                   | N/a                    | N/a                     | N/a                            | Adequate    | N/a                   | N/a                   | Very good             | N/a                |
| 9         | PAQ                                                            | Mojtabai<br>2012              | Doubtful            | Inadequate                                                                   | Adequate               | Very good               | N/a                            | N/a         | N/a                   | N/a                   | N/a                   | N/a                |

|    |                                                                           |               |            |            |          |           |     |          |     |            |            |            |
|----|---------------------------------------------------------------------------|---------------|------------|------------|----------|-----------|-----|----------|-----|------------|------------|------------|
| 10 | SMARTS                                                                    | Haddad 2014   | Adequate   | Inadequate | N/a      | N/a       | N/a | N/a      | N/a | N/a        | N/a        | N/a        |
| 11 | MSE                                                                       | Wykes 2017    | Adequate   | Doubtful   | N/a      | Very good | N/a | Adequate | N/a | Inadequate | N/a        | N/a        |
| 12 | ASEC                                                                      | Uher 2009     | Adequate   | Inadequate | N/a      | Very good | N/a | N/a      | N/a | N/a        | Inadequate | Inadequate |
| 13 | Side-effect checklist                                                     | Carpay 2005   | Inadequate | Inadequate | N/a      | N/a       | N/a | N/a      | N/a | N/a        | N/a        | N/a        |
| 14 | SIDAED                                                                    | Uijl 2006     | Inadequate | Inadequate | N/a      | N/a       | N/a | N/a      | N/a | N/a        | N/a        | Inadequate |
| 15 | Satisfaction with Asthma Treatment Questionnaire                          | Campbell 2003 | Doubtful   | Doubtful   | Doubtful | Very good | N/a | Adequate | N/a | N/a        | N/a        | N/a        |
| 16 | ICQ                                                                       | Foster 2006   | Inadequate | Doubtful   | N/a      | Very good | N/a | Adequate | N/a | N/a        | N/a        | Inadequate |
| 17 | PQAT                                                                      | Gater 2020    | Inadequate | Inadequate | N/a      | N/a       | N/a | N/a      | N/a | N/a        | N/a        | N/a        |
| 18 | Common Terminology Criteria for Adverse Events Side Effects Questionnaire | Pearce 2017   | Inadequate | Inadequate | N/a      | N/a       | N/a | N/a      | N/a | N/a        | N/a        | N/a        |
| 19 | Triptans Questionnaire                                                    | Feleppa 2004  | Inadequate | Inadequate | N/a      | N/a       | N/a | N/a      | N/a | N/a        | N/a        | N/a        |

N/a: Data not available for assessment
